# Supplementary material
Source: bioRxiv or medRxiv preprint supplement (https://medrxiv.org/highwire/filestream/71786/field_highwire_adjunct_files/0/2020.02.03.20020263-1.pdf)
Supplement: Supplementary file [file 2020.02.03.20020263-1.pdf]

# SUPPORTING INFORMATION

## Network-based Drug Repurposing for Human Coronavirus

Yadi Zhou<sup>1,#</sup>, Yuan Hou<sup>1,#</sup>, Jiayu Shen<sup>1</sup>, Yin Huang<sup>1</sup>, William Martin<sup>1</sup>, Feixiong Cheng<sup>1-3,\*</sup>

<sup>1</sup>Genomic Medicine Institute, Lerner Research Institute, Cleveland Clinic, Cleveland, OH 44195, USA

<sup>2</sup>Department of Molecular Medicine, Cleveland Clinic Lerner College of Medicine, Case Western Reserve University, Cleveland, OH 44195, USA

<sup>3</sup>Case Comprehensive Cancer Center, Case Western Reserve University School of Medicine, Cleveland, Oh 44106, USA

#Equal contribution

\*Correspondence to:

Feixiong Cheng, PhD

Lerner Research Institute

Cleveland Clinic

Tel: +1-216-444-7654; Fax: +1-216-636-0009

Email: [chengf@ccf.org](mailto:chengf@ccf.org)

### Supplementary Tables

**Table S1. Genome information of 15 coronaviruses used for phylogenetic analyses.**

**Table S2. Protein sequence identities across 5 protein regions in 15 coronaviruses.**

**Table S3. HCoV-associated host proteins with references.**

**Table S4. Repurposable drugs predicted by network-based approaches.**

**Table S1. Genome information of 15 coronaviruses used for phylogenetic analyses.**

| <b>GenBank ID</b> | <b>Coronavirus</b>     | <b>Identity %</b> | <b>Host</b> | <b>Location discovered</b> |
|-------------------|------------------------|-------------------|-------------|----------------------------|
| MN908947          | 2019-nCoV[Wuhan-Hu-1]  | 100               | Human       | China                      |
| MN938384          | 2019-nCoV[HKU-SZ-002a] | 99.99             | Human       | China                      |
| MN975262          | 2019-nCoV[HKU-SZ-005b] | 99.98             | Human       | China                      |
| AY390556          | SARS-CoV[GZ02]         | 79.7              | Human       | China                      |
| AY485277          | SARS-CoV[Sino1-11]     | 79.7              | Human       | China                      |
| AY508724          | SARS-CoV[NS-1]         | 79.69             | Human       | China                      |
| AY278489          | SARS-CoV[GD01]         | 79.65             | Human       | China                      |
| KT006149          | MERS-CoV[ChinaGD01]    | 54.1              | Human       | China                      |
| KM027262          | MERS-CoV[2014KSA_683]  | 54.02             | Human       | Kingdom of Saudi Arabia    |
| DQ415904          | HCoV-HKU1              | 52.41             | Human       | China                      |
| KJ958219          | HCoV-OC43              | 51.08             | Human       | China                      |
| AC_000192         | MHV                    | 50.23             | Mouse       | USA                        |
| MG772808          | HCoV-NL63              | 49.43             | Human       | China                      |
| KY421672          | IBV                    | 48.38             | Avian       | China                      |
| MN306046          | HCoV-229E              | 48.09             | Human       | USA                        |

**Table S2. Protein sequence identities across 5 protein regions in 15 coronaviruses.**

| <b>Coronavirus</b>     | <b>GenBank ID</b> | <b>Identity %</b> | <b>Protein</b>   |
|------------------------|-------------------|-------------------|------------------|
| 2019-nCoV[Wuhan-Hu-1]  | QHD43415.1        | 100               | ORF1ab           |
| 2019-nCoV[HKU-SZ-002a] | QHN73794.1        | 100               | ORF1ab           |
| 2019-nCoV[HKU-SZ-005b] | QHN73809.1        | 99.99             | ORF1ab           |
| SARS-CoV[GZ02]         | AAS00002.1        | 86.51             | ORF1ab           |
| SARS-CoV[Sino1-11]     | AAR23243.1        | 86.44             | ORF1ab           |
| SARS-CoV[GD01]         | AAP51225.1        | 86.35             | ORF1ab           |
| SARS-CoV[NS-1]         | AAR91584.1        | 86.35             | ORF1ab           |
| MERS-CoV[ChinaGD01]    | AKJ80135.2        | 48                | ORF1ab           |
| MERS-CoV[2014KSA_683]  | AIL23987.1        | 47.97             | ORF1ab           |
| HCoV-OC43              | AIX09804.1        | 44.93             | ORF1ab           |
| HCoV-HKU1              | ABD75567.1        | 44.69             | ORF1ab           |
| MHV                    | YP_209229.2       | 44.64             | ORF1ab           |
| HCoV-NL63              | AVA26872.1        | 40.05             | ORF1ab           |
| HCoV-229E              | QEG03783.1        | 39.95             | ORF1ab           |
| IBV                    | ATJ01091.1        | 27.86             | ORF1ab           |
| 2019-nCoV[Wuhan-Hu-1]  | QHD43416.1        | 100               | Spike            |
| 2019-nCoV[HKU-SZ-005b] | QHN73810.1        | 100               | Spike            |
| 2019-nCoV[HKU-SZ-002a] | QHN73795.1        | 100               | Spike            |
| SARS-CoV[GZ02]         | AAS00003.1        | 77.62             | Spike            |
| SARS-CoV[GD01]         | AAP51227.1        | 77.54             | Spike            |
| SARS-CoV[Sino1-11]     | AAR23250.1        | 77.46             | Spike            |
| SARS-CoV[NS-1]         | AAR91586.1        | 77.38             | Spike            |
| MHV                    | YP_209233.1       | 32.12             | Spike            |
| MERS-CoV[ChinaGD01]    | AKJ80137.2        | 31.93             | Spike            |
| MERS-CoV[2014KSA_683]  | AID55073.1        | 31.93             | Spike            |
| HCoV-OC43              | AIX09807.1        | 30.84             | Spike            |
| HCoV-HKU1              | ABD75561.1        | 30.17             | Spike            |
| HCoV-229E              | QEG03785.1        | 27.37             | Spike            |
| IBV                    | ATJ01093.1        | 27.14             | Spike            |
| HCoV-NL63              | AVA26873.1        | 26.89             | Spike            |
| 2019-nCoV[Wuhan-Hu-1]  | QHD43418.1        | 100               | Envelope protein |
| 2019-nCoV[HKU-SZ-002a] | QHN73797.1        | 100               | Envelope protein |
| 2019-nCoV[HKU-SZ-005b] | QHN73812.1        | 100               | Envelope protein |
| SARS-CoV[NS-1]         | AAR91589.1        | 96                | Envelope protein |
| SARS-CoV[GZ02]         | AAS00006.1        | 96                | Envelope protein |
| SARS-CoV[GD01]         | AAP51230.1        | 94.67             | Envelope protein |
| SARS-CoV[Sino1-11]     | AAR23247.1        | 94.59             | Envelope protein |
| MERS-CoV[2014KSA_683]  | AIL23994.1        | 36                | Envelope protein |
| MERS-CoV[ChinaGD01]    | AKJ80142.1        | 36                | Envelope protein |
| HCoV-HKU1              | ABD75563.1        | 29.33             | Envelope protein |
| HCoV-229E              | QEG03787.1        | 27.14             | Envelope protein |
| MHV                    | YP_209236.1       | 21.33             | Envelope protein |
| IBV                    | ATJ01096.1        | 20.27             | Envelope protein |
| HCoV-OC43              | AIX09809.1        | 18.67             | Envelope protein |
| HCoV-NL63              | AVA26875.1        | 17.14             | Envelope protein |
| 2019-nCoV[Wuhan-Hu-1]  | QHD43419.1        | 100               | Membrane         |
| 2019-nCoV[HKU-SZ-002a] | QHN73798.1        | 100               | Membrane         |
| 2019-nCoV[HKU-SZ-005b] | QHN73813.1        | 100               | Membrane         |
| SARS-CoV[GD01]         | AAP51231.1        | 89.59             | Membrane         |
| SARS-CoV[GZ02]         | AAS00007.1        | 89.59             | Membrane         |
| SARS-CoV[NS-1]         | AAR91590.1        | 89.59             | Membrane         |
| SARS-CoV[Sino1-11]     | AAR23248.1        | 89.14             | Membrane         |

|                        |             |       |              |
|------------------------|-------------|-------|--------------|
| MERS-CoV[2014KSA_683]  | AIL23995.1  | 39.27 | Membrane     |
| MERS-CoV[ChinaGD01]    | AKJ80143.1  | 39.27 | Membrane     |
| HCoV-OC43              | AIX09810.1  | 38.29 | Membrane     |
| MHV                    | YP_209237.1 | 37.1  | Membrane     |
| HCoV-HKU1              | ABD75564.1  | 35.29 | Membrane     |
| IBV                    | ATJ01097.1  | 30.56 | Membrane     |
| HCoV-229E              | QEG03788.1  | 28.77 | Membrane     |
| HCoV-NL63              | AVA26876.1  | 27.73 | Membrane     |
| 2019-nCoV[Wuhan-Hu-1]  | QHD43423.2  | 100   | Nucleocapsid |
| 2019-nCoV[HKU-SZ-002a] | QHN73802.1  | 100   | Nucleocapsid |
| 2019-nCoV[HKU-SZ-005b] | QHN73817.1  | 100   | Nucleocapsid |
| SARS-CoV[GD01]         | AAP51234.1  | 89.74 | Nucleocapsid |
| SARS-CoV[GZ02]         | AAS00011.1  | 89.74 | Nucleocapsid |
| SARS-CoV[Sino1-11]     | AAR23249.1  | 89.74 | Nucleocapsid |
| SARS-CoV[NS-1]         | AAR91593.1  | 89.74 | Nucleocapsid |
| MERS-CoV[2014KSA_683]  | AIL23996.1  | 48.85 | Nucleocapsid |
| MERS-CoV[ChinaGD01]    | AKJ80144.1  | 48.85 | Nucleocapsid |
| MHV                    | YP_209238.1 | 35.31 | Nucleocapsid |
| HCoV-HKU1              | ABD75565.1  | 35.22 | Nucleocapsid |
| HCoV-OC43              | AIX09811.1  | 34.79 | Nucleocapsid |
| IBV                    | ATJ01100.1  | 29.46 | Nucleocapsid |
| HCoV-NL63              | AVA26877.1  | 28.03 | Nucleocapsid |
| HCoV-229E              | QEG03789.1  | 27.35 | Nucleocapsid |

**Table S3. HCoV-associated host proteins with references.**

| <b>Coronavirus</b> | <b>Host Protein</b> | <b>Host Gene ID</b> | <b>PubMed ID</b> |
|--------------------|---------------------|---------------------|------------------|
| IBV                | NONO                | 4841                | 23637410         |
| IBV                | GSK3A               | 2931                | 23637410         |
| IBV                | GSK3B               | 2932                | 23637410         |
| IBV                | PABPC1              | 26986               | 23637410         |
| IBV                | PABPC4              | 8761                | 23637410         |
| IBV                | HNRNPA1             | 3178                | 23637410         |
| IBV                | HNRNPA2B1           | 3181                | 23637410         |
| IBV                | NPM1                | 4869                | 23637410         |
| IBV                | G3BP1               | 10146               | 23637410         |
| IBV                | G3BP2               | 9908                | 23637410         |
| IBV                | RPL19               | 6143                | 23637410         |
| IBV                | PARP1               | 142                 | 23637410         |
| IBV                | NCL                 | 4691                | 23637410         |
| IBV                | DDX1                | 1653                | 23637410         |
| SARS               | RYBP                | 23429               | 22046132         |
| SARS               | PPIA                | 5478                | 22046132         |
| SARS               | NOMO3               | 408050              | 22046132         |
| SARS               | FKBP1A              | 2280                | 22046132         |
| SARS               | PPIG                | 9360                | 22046132         |
| SARS               | MARK3               | 4140                | 22046132         |
| SARS               | PPIH                | 10465               | 22046132         |
| SARS               | RCAN3               | 11123               | 22046132         |
| SARS               | HGS                 | 9146                | 22046132         |
| SARS               | BAG6                | 7917                | 22046132         |
| SARS               | DDAH2               | 23564               | 22046132         |
| SARS               | CAMLG               | 819                 | 22046132         |
| SARS               | CHMP2B              | 25978               | 22046132         |
| SARS               | SNAP47              | 116841              | 22046132         |
| SARS               | MKRN2               | 23609               | 22046132         |
| SARS               | TPSAB1              | 7177                | 22046132         |
| SARS               | SERPING1            | 710                 | 22046132         |
| SARS               | MKRN3               | 7681                | 22046132         |
| SARS               | PSMA2               | 5683                | 22046132         |
| SARS               | ABHD17A             | 81926               | 22046132         |
| SARS               | PFDN5               | 5204                | 22046132         |
| SARS               | MIF4GD              | 57409               | 22046132         |
| SARS               | NDUFA10             | 4705                | 22046132         |
| SARS               | VKORC1              | 79001               | 22046132         |
| SARS               | LAS1L               | 81887               | 22046132         |
| SARS               | H2AFY2              | 55506               | 22046132         |
| SARS               | RPS20               | 6224                | 22046132         |
| SARS               | CHEK2               | 11200               | 22046132         |
| SARS               | TERF1               | 7013                | 22046132         |
| SARS               | DCTN2               | 10540               | 22046132         |
| SARS               | DDX5                | 1655                | 22046132         |
| SARS               | C11orf74            | 119710              | 22046132         |
| SARS               | EIF3F               | 8665                | 22046132         |
| SARS               | EEF1A1              | 1915                | 22046132         |
| SARS               | CAV1                | 857                 | 22046132         |
| SARS               | IKBKB               | 3551                | 22046132         |
| SARS               | UBE2I               | 7329                | 22046132         |
| SARS               | SGTA                | 6449                | 22046132         |
| SARS               | ATP6V1G1            | 9550                | 22046132         |

---

|           |           |        |          |
|-----------|-----------|--------|----------|
| SARS      | BTF3      | 689    | 22046132 |
| SARS      | ATF5      | 22809  | 22046132 |
| SARS      | ND4L      | 4539   | 22046132 |
| SARS      | COX2      | 4513   | 22046132 |
| SARS      | HNRNPA1   | 3178   | 22046132 |
| SARS      | ACE2      | 59272  | 22046132 |
| SARS      | CLEC4G    | 339390 | 22046132 |
| SARS      | CD209     | 30835  | 22046132 |
| SARS      | CLEC4M    | 10332  | 22046132 |
| SARS      | IRF3      | 3661   | 22046132 |
| SARS      | KPNA2     | 3838   | 22046132 |
| SARS      | SFTPD     | 6441   | 22046132 |
| SARS      | PPIA      | 5478   | 22046132 |
| SARS      | BCL2L1    | 598    | 22046132 |
| SARS      | BCL2L2    | 599    | 22046132 |
| SARS      | MCL1      | 4170   | 22046132 |
| SARS      | BCL2A1    | 597    | 22046132 |
| SARS      | BCL2      | 596    | 22046132 |
| MERS      | SKP2      | 6502   | 31852899 |
| MERS      | KPNA4     | 3840   | 29370303 |
| MERS      | PRKRA     | 8575   | 24522921 |
| MERS      | CD9       | 928    | 28759649 |
| MERS      | TMPRSS2   | 7113   | 28759649 |
| SARS      | IKBKB     | 3551   | 17705188 |
| HCoV-229E | ANPEP     | 290    | 28643204 |
| HCoV-NL63 | ACE2      | 59272  | 28643204 |
| IBV       | ZCRB1     | 85437  | 28643204 |
| MERS      | DPP4      | 1803   | 28643204 |
| MHV       | HNRNPA1   | 3178   | 28643204 |
| MHV       | SYNCRIP   | 10492  | 28643204 |
| MHV       | PTBP1     | 5725   | 28643204 |
| MHV       | CEACAM1   | 634    | 28643204 |
| SARS      | ZCRB1     | 85437  | 28643204 |
| SARS      | ACE2      | 59272  | 28643204 |
| IBV       | ANXA2     | 302    | 28643204 |
| MHV       | HNRNPA2B1 | 3181   | 28643204 |
| MHV       | HNRNPA3   | 220988 | 28643204 |
| MHV       | ACO2      | 50     | 28643204 |
| MHV       | DNAJB1    | 3337   | 28643204 |
| MHV       | HSPD1     | 3329   | 28643204 |
| MHV       | HSPA9     | 3313   | 28643204 |
| MHV       | COPB2     | 9276   | 30632963 |
| MHV       | RPL13A    | 23521  | 30632963 |
| MHV       | EIF3E     | 3646   | 30632963 |
| MHV       | EIF3I     | 8668   | 30632963 |
| MHV       | NMT1      | 4836   | 30632963 |
| MHV       | CHMP4B    | 128866 | 30632963 |
| MHV       | EIF3F     | 8665   | 30632963 |
| MHV       | GBF1      | 8729   | 30632963 |
| MHV       | RRM2      | 6241   | 30632963 |
| MHV       | KIF11     | 3832   | 30632963 |
| MHV       | PSMD1     | 5707   | 30632963 |
| MHV       | SRP54     | 6729   | 30632963 |
| MHV       | NUDCD1    | 84955  | 30632963 |
| MHV       | NACA      | 4666   | 30632963 |
| MHV       | SNX9      | 51429  | 30632963 |

---

---

|           |         |       |                |
|-----------|---------|-------|----------------|
| MHV       | BTF3    | 689   | 30632963       |
| MHV       | SCFD1   | 23256 | 30632963       |
| MHV       | PSMC2   | 5701  | 30632963       |
| MHV       | TFEB    | 7942  | 30632963       |
| MHV       | TWF2    | 11344 | 30632963       |
| MHV       | YKT6    | 10652 | 30632963       |
| MHV       | KPNB1   | 3837  | 30632963       |
| MHV       | STX5    | 6811  | 30632963       |
| MHV       | STAT5A  | 6776  | 30632963       |
| MHV       | RSL24D1 | 51187 | 30632963       |
| MHV       | ACBD5   | 91452 | 30632963       |
| SARS      | PHB     | 5245  | STRING Viruses |
| SARS      | JUN     | 3725  | STRING Viruses |
| SARS      | STAT3   | 6774  | STRING Viruses |
| SARS      | PPP1CA  | 5499  | STRING Viruses |
| SARS      | SPECC1  | 92521 | STRING Viruses |
| SARS      | FGL2    | 10875 | STRING Viruses |
| SARS      | XPO1    | 7514  | STRING Viruses |
| HCoV-229E | TGFB1   | 7040  | STRING Viruses |
| HCoV-229E | FGL2    | 10875 | STRING Viruses |
| MHV       | SMAD3   | 4088  | STRING Viruses |

---

**Table S4. Repurposable drugs predicted by network-based approaches.**

| DB ID   | Name                                                                                           | Z-score | P-value | GSEA score | Literature evidence                    |
|---------|------------------------------------------------------------------------------------------------|---------|---------|------------|----------------------------------------|
| DB01029 | Irbesartan                                                                                     | -5.98   | 0.001   | NA         | 25929767, 26086883, 24717262           |
| DB02152 | K-252a                                                                                         | -4.22   | 0.006   | NA         |                                        |
| DB08813 | Nadroparin                                                                                     | -3.46   | 0.005   | NA         |                                        |
| DB00890 | Dienestrol                                                                                     | -3.30   | 0.003   | 0          |                                        |
| DB00539 | Toremifene                                                                                     | -3.23   | 0.011   | NA         | 27362232, 29566060, 24841273, 24841269 |
| DB03963 | S-(Dimethylarsenic)Cysteine                                                                    | -3.00   | 0       | NA         |                                        |
| DB08005 | 4-[[5-chloro-4-(1H-indol-3-yl)pyrimidin-2-yl]amino]-N-ethylpiperidine-1-carboxamide            | -2.81   | 0.013   | NA         |                                        |
| DB04930 | Permethrin                                                                                     | -2.67   | 0.011   | NA         |                                        |
| DB01357 | Mestranol                                                                                      | -2.64   | 0.01    | 2          |                                        |
| DB01744 | Camphor                                                                                        | -2.64   | 0.007   | NA         | 27823881,30165308                      |
| DB00286 | Conjugated estrogens                                                                           | -2.60   | 0.007   | NA         |                                        |
| DB02187 | Equilin                                                                                        | -2.52   | 0.012   | 3          | 27169275                               |
| DB00563 | Methotrexate                                                                                   | -2.46   | 0.012   | 2          |                                        |
| DB00544 | Fluorouracil                                                                                   | -2.44   | 0.009   | NA         |                                        |
| DB07931 | Hexestrol                                                                                      | -2.44   | 0.008   | 0          | 27169275                               |
| DB00244 | Mesalazine                                                                                     | -2.44   | 0.005   | 3          | 25914477                               |
| DB01033 | Mercaptopurine                                                                                 | -2.44   | 0.02    | 1          | 18313035, 19374142, 25542975           |
| DB00715 | Paroxetine                                                                                     | -2.42   | 0.014   | 2          | 29272110                               |
| DB00852 | Pseudoephedrine                                                                                | -2.42   | 0.014   | NA         |                                        |
| DB01769 | 3-sulfino-L-alanine                                                                            | -2.41   | 0.015   | NA         |                                        |
| DB00614 | Furazolidone                                                                                   | -2.39   | 0.01    | 2          |                                        |
| DB04824 | Phenolphthalein                                                                                | -2.38   | 0.013   | NA         |                                        |
| DB00877 | Sirinlimus                                                                                     | -2.35   | 0.006   | 3          | 23135723, 26276683, 29143192, 24105455 |
| DB00570 | Vinblastine                                                                                    | -2.28   | 0.014   | 2          |                                        |
| DB00812 | Phenylbutazone                                                                                 | -2.25   | 0.02    | NA         |                                        |
| DB04575 | Quinestrol                                                                                     | -2.23   | 0.015   | NA         |                                        |
| DB04938 | Ospemifene                                                                                     | -2.23   | 0.015   | NA         |                                        |
| DB09092 | Xanthinol                                                                                      | -2.23   | 0.015   | NA         |                                        |
| DB09317 | Synthetic Conjugated Estrogens, A                                                              | -2.23   | 0.015   | NA         |                                        |
| DB09318 | Synthetic Conjugated Estrogens, B                                                              | -2.23   | 0.015   | NA         |                                        |
| DB01183 | Naloxone                                                                                       | -2.22   | 0.021   | 1          |                                        |
| DB00242 | Cladribine                                                                                     | -2.21   | 0.02    | NA         |                                        |
| DB02615 | Compound 19                                                                                    | -2.20   | 0.016   | NA         |                                        |
| DB01275 | Hydralazine                                                                                    | -2.20   | 0.013   | 0          |                                        |
| DB08231 | Myristic acid                                                                                  | -2.19   | 0.018   | NA         |                                        |
| DB00170 | Menadione                                                                                      | -2.17   | 0.012   | 1          |                                        |
| DB01248 | Docetaxel                                                                                      | -2.17   | 0.014   | NA         |                                        |
| DB05465 | Tandutinib                                                                                     | -2.11   | 0.02    | NA         |                                        |
| DB08896 | Regorafenib                                                                                    | -2.06   | 0.017   | NA         |                                        |
| DB08888 | Ocriplasmin                                                                                    | -2.04   | 0.032   | NA         |                                        |
| DB00361 | Vinorelbine                                                                                    | -2.03   | 0.02    | NA         |                                        |
| DB07502 | 4-bromo-6-(6-hydroxy-1,2-benzisoxazol-3-yl)benzene-1,3-diol                                    | -2.02   | 0.019   | NA         |                                        |
| DB06871 | 17-METHYL-17-ALPHA-DIHYDROEQUILENIN                                                            | -2.02   | 0.021   | NA         |                                        |
| DB06898 | 4-(2-amino-1-methyl-1H-imidazo[4,5-b]pyridin-6-yl)phenol                                       | -2.02   | 0.021   | NA         |                                        |
| DB07086 | 4-[(1S,2S,5S)-5-(HYDROXYMETHYL)-8-METHYL-3-OXABICYCLO[3.3.1]NON-7-EN-2-YL]PHENOL               | -2.02   | 0.021   | NA         |                                        |
| DB07087 | 4-[(1S,2S,5S,9R)-5-(HYDROXYMETHYL)-8,9-DIMETHYL-3-OXABICYCLO[3.3.1]NON-7-EN-2-YL]PHENOL        | -2.02   | 0.021   | NA         |                                        |
| DB07195 | 4-[(1S,2S,5S)-5-(HYDROXYMETHYL)-6,8,9-TRIMETHYL-3-OXABICYCLO[3.3.1]NON-7-EN-2-YL]PHENOL        | -2.02   | 0.021   | NA         |                                        |
| DB07678 | (9ALPHA,13BETA,17BETA)-2-[(1Z)-BUT-1-EN-1-YL]ESTRA-1,3,5(10)-TRIENE-3,17-DIOL                  | -2.02   | 0.021   | NA         |                                        |
| DB07707 | (9BETA,11ALPHA,13ALPHA,14BETA,17ALPHA)-11-(METHOXYMETHYL)ESTRA-1(10),2,4-TRIENE-3,17-DIOL      | -2.02   | 0.021   | NA         |                                        |
| DB07708 | 3-CHLORO-2-(4-HYDROXYPHENYL)-2H-INDAZOL-5-OL                                                   | -2.02   | 0.021   | NA         |                                        |
| DB07712 | 3-ETHYL-2-(4-HYDROXYPHENYL)-2H-INDAZOL-5-OL                                                    | -2.02   | 0.021   | NA         |                                        |
| DB07932 | dimethyl (1R,4S)-5,6-bis(4-hydroxyphenyl)-7-oxabicyclo[2.2.1]hepta-2,5-diene-2,3-dicarboxylate | -2.02   | 0.021   | NA         |                                        |
| DB08048 | 4-(6-HYDROXY-1H-INDAZOL-3-YL)BENZENE-1,3-DIOL                                                  | -2.02   | 0.021   | NA         |                                        |



|         |                                                                                                               |       |       |    |                              |
|---------|---------------------------------------------------------------------------------------------------------------|-------|-------|----|------------------------------|
| DB08320 | DIETHYL (1R,2S,3R,4S)-5,6-BIS(4-HYDROXYPHENYL)-7-OXABICYCLO[2.2.1]HEPT-5-ENE-2,3-DICARBOXYLATE                | -2.02 | 0.021 | NA |                              |
| DB08398 | 2-Amino-1-methyl-6-phenylimidazo(4,5-b)pyridine                                                               | -2.02 | 0.021 | NA |                              |
| DB08595 | 4-[(1S,2R,5S)-4,4,8-TRIMETHYL-3-OXABICYCLO[3.3.1]NON-7-EN-2-YL]PHENOL                                         | -2.02 | 0.021 | NA |                              |
| DB03909 | Adenosine-5'-[Beta, Gamma-Methylene]Triphosphate                                                              | -1.98 | 0.016 | NA |                              |
| DB04967 | Lucanthone                                                                                                    | -1.97 | 0.019 | NA |                              |
| DB01136 | Carvedilol                                                                                                    | -1.94 | 0.023 | NA | 12535832                     |
| DB02513 | Thymol                                                                                                        | -1.93 | 0.001 | NA | 28886313                     |
| DB01394 | Colchicine                                                                                                    | -1.92 | 0.027 | 0  | 28795759                     |
| DB00431 | Lindane                                                                                                       | -1.92 | 0.018 | NA |                              |
| DB00098 | Anti-thymocyte immunoglobulin (rabbit)                                                                        | -1.91 | 0.016 | NA |                              |
| DB00321 | Amitriptyline                                                                                                 | -1.89 | 0.03  | 2  |                              |
| DB00668 | Epinephrine                                                                                                   | -1.88 | 0.031 | NA |                              |
| DB00970 | Dactinomycin                                                                                                  | -1.88 | 0.027 | NA | 1335030                      |
| DB07886 | Hydrocortisone                                                                                                | -1.88 | 0.013 | NA | 16891588                     |
| DB00294 | Etonogestrel                                                                                                  | -1.82 | 0.023 | NA |                              |
| DB00304 | Desogestrel                                                                                                   | -1.82 | 0.023 | NA |                              |
| DB02538 | N-[4-(2-Methylimidazo[1,2-a]Pyridin-3-Yl)-2-Pyrimidinyl]Acetamide                                             | -1.77 | 0.027 | NA |                              |
| DB04006 | [2-Amino-6-(2,6-Difluoro-Benzoyl)-Imidazo[1,2-a]Pyridin-3-Yl]-Phenyl-Methanone                                | -1.77 | 0.027 | NA |                              |
| DB04518 | 3-[4-(2,4-Dimethyl-Thiazol-5-Yl)-Pyrimidin-2-Ylamino]-Phenol                                                  | -1.77 | 0.027 | NA |                              |
| DB07790 | N-(2-METHOXYETHYL)-4-((4-[2-METHYL-1-(1-METHYLETHYL)-1H-IMIDAZOL-5-YL]PYRIMIDIN-2-YL)AMINO)BENZENESULFONAMIDE | -1.77 | 0.027 | NA |                              |
| DB08285 | (2R)-2-[[4-(benzylamino)-8-(1-methylethyl)pyrazolo[1,5-a][1,3,5]triazin-2-yl]amino]butan-1-ol                 | -1.77 | 0.027 | NA |                              |
| DB00714 | Apomorphine                                                                                                   | -1.74 | 0.033 | 3  |                              |
| DB01420 | Testosterone propionate                                                                                       | -1.74 | 0.027 | NA |                              |
| DB01065 | Melatonin                                                                                                     | -1.72 | 0.029 | 2  | 25262626, 20070490           |
| DB06710 | Methyltestosterone                                                                                            | -1.71 | 0.024 | NA |                              |
| DB00108 | Natalizumab                                                                                                   | -1.69 | 0.034 | NA |                              |
| DB00947 | Fulvestrant                                                                                                   | -1.67 | 0.031 | 3  |                              |
| DB08900 | Teduglutide                                                                                                   | -1.66 | 0.004 | NA |                              |
| DB00338 | Omeprazole                                                                                                    | -1.65 | 0.031 | 0  |                              |
| DB00367 | Levonorgestrel                                                                                                | -1.64 | 0.025 | 2  |                              |
| DB06287 | Temsirolimus                                                                                                  | -1.62 | 0.043 | NA |                              |
| DB01103 | Quinacrine                                                                                                    | -1.62 | 0.044 | 1  | 23301007, 31307979, 27890675 |
| DB06782 | Dimercaprol                                                                                                   | -1.60 | 0.041 | NA |                              |
| DB00624 | Testosterone                                                                                                  | -1.60 | 0.035 | 0  | 29557189, 30522976           |
| DB06822 | Tinzaparin                                                                                                    | -1.60 | 0.043 | NA |                              |
| DB00700 | Eplerenone                                                                                                    | -1.59 | 0.028 | NA | 19213804                     |
| DB00162 | Vitamin A                                                                                                     | -1.58 | 0.045 | NA | 8379807, 7751694             |
| DB09148 | Florbetaben (18F)                                                                                             | -1.58 | 0.034 | NA |                              |
| DB09149 | Florbetapir (18F)                                                                                             | -1.58 | 0.034 | NA |                              |
| DB09151 | Flutemetamol (18F)                                                                                            | -1.58 | 0.034 | NA |                              |
| DB02091 | 4-(2,4-Dimethyl-Thiazol-5-Yl)-Pyrimidin-2-Ylamine                                                             | -1.57 | 0.044 | NA |                              |
| DB02915 | 4-(2,4-Dimethyl-1,3-thiazol-5-yl)-N-[4-(trifluoromethyl)phenyl]-2-pyrimidinamine                              | -1.57 | 0.044 | NA |                              |
| DB06844 | 4-[(7-OXO-7H-THIAZOLO[5,4-E]INDOL-8-YLMETHYL)-AMINO]-N-PYRIDIN-2-YL-BENZENESULFONAMIDE                        | -1.57 | 0.044 | NA |                              |
| DB06948 | 2-ANILINO-6-CYCLOHEXYLMETHOXYPURINE                                                                           | -1.57 | 0.044 | NA |                              |
| DB07137 | (2S)-N-[(3Z)-5-CYCLOPROPYL-3H-PYRAZOL-3-YLIDENE]-2-[4-(2-OXOIMIDAZOLIDIN-1-YL)PHENYL]PROPANAMIDE              | -1.57 | 0.044 | NA |                              |
| DB07203 | 6-CYCLOHEXYLMETHOXY-2-(3'-CHLOROANILINO)PURINE                                                                | -1.57 | 0.044 | NA |                              |
| DB07539 | 4-{5-[(Z)-(2-IMINO-4-OXO-1,3-THIAZOLIDIN-5-YLIDENE)METHYL]FURAN-2-YL}BENZOIC ACID                             | -1.57 | 0.044 | NA |                              |
| DB07852 | 1-(3,5-DICHLOROPHENYL)-5-METHYL-1H-1,2,4-TRIAZOLE-3-CARBOXYLIC ACID                                           | -1.57 | 0.044 | NA |                              |
| DB08178 | 4-(4-methoxy-1H-pyrrolo[2,3-b]pyridin-3-yl)pyrimidin-2-amine                                                  | -1.57 | 0.044 | NA |                              |
| DB08182 | 4-(4-propoxy-1H-pyrrolo[2,3-b]pyridin-3-yl)pyrimidin-2-amine                                                  | -1.57 | 0.044 | NA |                              |

|         |                                                                                                                                |       |       |    |                                                  |
|---------|--------------------------------------------------------------------------------------------------------------------------------|-------|-------|----|--------------------------------------------------|
| DB08218 | HYDROXY(OXO)(3-((2Z)-4-[3-(1H-1,2,4-TRIAZOL-1-YLMETHYL)PHENYL]PYRIMIDIN-2(5H)-YLIDENE)AMINO)PHENYL)AMMONIUM                    | -1.57 | 0.044 | NA |                                                  |
| DB08219 | 4-METHYL-5-((2E)-2-[(4-MORPHOLIN-4-YLPHENYL)IMINO]-2,5-DIHYDROPYRIMIDIN-4-YL)-1,3-THIAZOL-2-AMINE                              | -1.57 | 0.044 | NA |                                                  |
| DB08233 | 6-CYCLOHEXYLMETHYLOXY-2-(4'-HYDROXYANILINO)PURINE                                                                              | -1.57 | 0.044 | NA |                                                  |
| DB08241 | 4-(6-CYCLOHEXYLMETHOXY-9H-PURIN-2-YLAMINO)--BENZAMIDE                                                                          | -1.57 | 0.044 | NA |                                                  |
| DB08248 | 3-(6-CYCLOHEXYLMETHOXY-9H-PURIN-2-YLAMINO)-BENZENESULFONAMIDE                                                                  | -1.57 | 0.044 | NA |                                                  |
| DB08527 | 1-[4-(AMINOSULFONYL)PHENYL]-1,6-DIHYDROPYRAZOLO[3,4-E]INDAZOLE-3-CARBOXAMIDE                                                   | -1.57 | 0.044 | NA |                                                  |
| DB01370 | Aluminium                                                                                                                      | -1.57 | 0.042 | NA |                                                  |
| DB02197 | 4-[(4-Imidazo[1,2-a]Pyridin-3-Ylpyrimidin-2-Yl)Amino]Benzenesulfonamide                                                        | -1.56 | 0.042 | NA |                                                  |
| DB00269 | Chlorotrianisene                                                                                                               | -1.55 | 0.047 | NA |                                                  |
| DB01878 | Benzophenone                                                                                                                   | -1.55 | 0.047 | NA |                                                  |
| DB04020 | 4-(2-[[4-[[3-(4-Chlorophenyl)Propyl]Sulfanyl]-6-(1-Piperazinyl)-1,3,5-Triazin-2-Yl]Amino]Ethyl)Phenol                          | -1.55 | 0.047 | NA |                                                  |
| DB05414 | Pipendoxifene                                                                                                                  | -1.55 | 0.047 | NA |                                                  |
| DB06401 | Bazedoxifene                                                                                                                   | -1.55 | 0.047 | NA |                                                  |
| DB06937 | 4-(6-HYDROXY-BENZO[D]ISOXAZOL-3-YL)BENZENE-1,3-DIOL                                                                            | -1.55 | 0.047 | NA |                                                  |
| DB07036 | (3aS,4R,9bR)-2,2-difluoro-4-(4-hydroxyphenyl)-6-(methoxymethyl)-1,2,3,3a,4,9b-hexahydrocyclopenta[c]chromen-8-ol               | -1.55 | 0.047 | NA |                                                  |
| DB07567 | (2R,3R,4S)-3-(4-HYDROXYPHENYL)-4-METHYL-2-[4-(2-PYRROLIDIN-1-YLETHOXY)PHENYL]CHROMAN-6-OL                                      | -1.55 | 0.047 | NA |                                                  |
| DB07638 | (3AS,4R,9BR)-2,2-DIFLUORO-4-(4-HYDROXYPHENYL)-1,2,3,3A,4,9B-HEXAHYDROCYCLOPENTA[C]CHROMEN-8-OL                                 | -1.55 | 0.047 | NA |                                                  |
| DB07757 | (9aS)-4-bromo-9a-butyl-7-hydroxy-1,2,9,9a-tetrahydro-3H-fluoren-3-one                                                          | -1.55 | 0.047 | NA |                                                  |
| DB07933 | Erteberel                                                                                                                      | -1.55 | 0.047 | NA |                                                  |
| DB07991 | N-[(1R)-3-(4-HYDROXYPHENYL)-1-METHYLPROPYL]-2-(2-PHENYL-1H-INDOL-3-YL)ACETAMIDE                                                | -1.55 | 0.047 | NA |                                                  |
| DB08020 | (3AS,4R,9BR)-4-(4-HYDROXYPHENYL)-6-(METHOXYMETHYL)-1,2,3,3A,4,9B-HEXAHYDROCYCLOPENTA[C]CHROMEN-8-OL                            | -1.55 | 0.047 | NA |                                                  |
| DB08737 | (3AS,4R,9BR)-4-(4-HYDROXYPHENYL)-1,2,3,3A,4,9B-HEXAHYDROCYCLOPENTA[C]CHROMEN-9-OL                                              | -1.55 | 0.047 | NA |                                                  |
| DB09535 | Octocrylene                                                                                                                    | -1.55 | 0.047 | NA |                                                  |
| DB07715 | Emodin                                                                                                                         | -1.54 | 0.035 | NA | 21050882, 16940925, 21356245, 16730806, 24071990 |
| DB00851 | Dacarbazine                                                                                                                    | -1.53 | 0.036 | 0  |                                                  |
| DB06412 | Oxymetholone                                                                                                                   | -1.53 | 0.041 | NA | 12815555                                         |
| DB00396 | Progesterone                                                                                                                   | -1.53 | 0.034 | 1  |                                                  |
| DB07471 | 5-[5,6-BIS(METHYLOXY)-1H-BENZIMIDAZOL-1-YL]-3-[[1-(2-CHLOROPHENYL)ETHYL]OXY]-2-THIOPHENECARBOXAMIDE                            | -1.52 | 0.036 | NA |                                                  |
| DB02901 | Stanolone                                                                                                                      | -1.52 | 0.043 | NA |                                                  |
| DB03801 | Lysine Nz-Carboxylic Acid                                                                                                      | -1.51 | 0.04  | NA |                                                  |
| DB08683 | REL-(9R,12S)-9,10,11,12-TETRAHYDRO-9,12-EPOXY-1H-DIINDOLO[1,2,3-FG:3',2',1'-KL]PYRROLO[3,4-I][1,6]BENZODIAZOCINE-1,3(2H)-DIONE | -1.51 | 0.045 | NA |                                                  |
| DB09257 | Gimeracil                                                                                                                      | -1.50 | 0.009 | NA |                                                  |
